# Supplementary material for: Prenatal Maternal Docosahexaenoic Acid (DHA) Supplementation and Newborn Anthropometry in India: Findings from DHANI
Source: PubMed Central journal article supplement (PMC7996222; doi:10.3390/nu13030730), 2021-02-25
Supplement: nutrients-13-00730-s001.pdf [file nutrients-13-00730-s001.pdf]

## Supplementary Tables

**Table S1.** Comparison of baseline characteristics between women who continued to participate in the study through delivery and those who did not.

| Variable(s)                                             | Randomized and Continued through Delivery (N = 880) | Randomized but Did Not Continue through Delivery (N = 55) | p-Value |
|---------------------------------------------------------|-----------------------------------------------------|-----------------------------------------------------------|---------|
| Maternal age (year), mean ± SD                          | 23.5 ± 3.6                                          | 23.7 (3.9)                                                | 0.68    |
| Gestational age at enrolment (weeks), median (p25, p75) | 15.0 (12.0, 18.0)                                   | 14.0 (11.0, 17.0)                                         | 0.11    |
| Primigravida, n (%)                                     | 349 (39.7%)                                         | 26 (47.3%)                                                | 0.26    |
| Education, n (%)                                        |                                                     |                                                           |         |
| College graduated and above                             | 158 (18.0%)                                         | 7 (12.7%)                                                 | 0.41    |
| High school/Secondary                                   | 695 (79.0%)                                         | 45 (81.8%)                                                |         |
| Employed, n (%)                                         | 213 (24.2%)                                         | 7 (12.7%)                                                 | 0.052   |
| Household monthly income (INR), n (%) (Rs > 20,000)     | 102 (11.6%)                                         | 4 (7.3%)                                                  | 0.48    |
| Treatment assignment, n (%)                             |                                                     |                                                           |         |
| DHA                                                     | 440 (50.0%)                                         | 28 (50.9%)                                                | 0.90    |
| Placebo                                                 | 440 (50.0%)                                         | 27 (49.1%)                                                |         |

**Table S2.** Dietary data on subsample at randomization (n = 278).

| Macronutrient fractions              | DHA (N = 140)           | Placebo (N = 138)       | p-Value |
|--------------------------------------|-------------------------|-------------------------|---------|
| Energy (Kcal), mean ± SD             | 1358.2 ± 431.0          | 1391.4 ± 370.9          | 0.49    |
| Energy (Kcal), median (p25, p75)     | 1231.6 (1066.3, 1682.2) | 1347.3 (1088.4, 1629.6) | 0.22    |
| Protein (g), mean ± SD               | 48.9 ± 13.7             | 49.2 ± 12.7             | 0.84    |
| Protein (g), median (p25, p75)       | 45.2 (39.7, 59.1)       | 48.7 (40.6, 56.8)       | 0.64    |
| Fat (g), mean ± SD                   | 38.8 ± 16.6             | 38.2 ± 13.1             | 0.73    |
| Fat (g), median (p25, p75)           | 35.9 (28.2, 45.4)       | 36.3 (28.8, 45.0)       | 0.92    |
| Carbohydrates (g), mean ± SD         | 202.3 ± 75.4            | 212.4 ± 71.4            | 0.25    |
| Carbohydrates (g), median (p25, p75) | 178.0 (156.2, 247.3)    | 198.1 (163.4, 254.3)    | 0.14    |

Kcal: kilocalories; g: grams; data are presented as mean ± standard deviation or median (p25, p75); (p25, p75): interquartile interval. p-Value for difference in mean values calculated using two-sample t-test. p-Value for difference in median values calculated using Wilcoxon rank sum test.

**Table 3.** Mean change in DHA levels from baseline to delivery.

| DHA (Mol% of Fatty Acid) | Baseline          | Delivery          | Mean Difference *  | p-Value |
|--------------------------|-------------------|-------------------|--------------------|---------|
| DHA group, mean (SD)     | 0.87 (0.79)       | 2.08 (1.75)       | 1.20 (0.98, 1.43)  | <0.001  |
| median (p25, p75)        | 0.57 (0.32, 1.22) | 1.52 (0.62, 3.17) |                    |         |
| Placebo group, mean (SD) | 0.89 (0.71)       | 1.13 (0.86)       | 0.24 (0.11, -0.36) | 0.0002  |
| median (p25, p75)        | 0.56 (0.36, 1.29) | 0.83 (0.41, 1.73) |                    |         |

\* Difference: delivery minus baseline; DHA (n = 250) placebo (n = 216). Mean difference and p value calculated using paired t-test.
